# Supplementary material for: Interplay between Partial EMT and Cisplatin Resistance as the Drivers for Recurrence in HNSCC
Source: MDPI journal article supplement (doi:10.3390/biomedicines10102482), 2022-10-05
Supplement: s1 [file s1]

**Supplementary Materials:****Table S1 A.** Study population of Slug and KLF4 immunohistochemistry evaluation. N=72.

|                                 |                                |    |
|---------------------------------|--------------------------------|----|
| <b>gender</b>                   | male                           | 63 |
|                                 | female                         | 9  |
| <b>age</b>                      | <=50                           | 3  |
|                                 | 51-60                          | 11 |
|                                 | 61-70                          | 25 |
|                                 | 71-80                          | 22 |
|                                 | >80                            | 11 |
| <b>tumor type</b>               | Primary                        | 58 |
|                                 | Recurrence                     | 7  |
|                                 | Secondary                      | 7  |
| <b>Site</b>                     | Oral                           | 11 |
|                                 | Larynx                         | 12 |
|                                 | Oropharynx                     | 36 |
|                                 | Hypopharynx                    | 10 |
|                                 | Other                          | 3  |
| <b>histology</b>                | squamous cell carcinoma        | 72 |
| <b>HPV status</b>               | P16-positive ( $\geq 70\%$ ) * | 18 |
|                                 | P16-negative ( $< 70\%$ )      | 54 |
| <b>Survival</b>                 | alive                          | 53 |
|                                 | deceased                       | 19 |
| <b>First treatment modality</b> | Surgical/ Surgical PORT        | 34 |
|                                 | Best supportive care           | 3  |
|                                 | R(C)T                          | 35 |

\*HPV-positivity was also confirmed by HPV-specific PCR.

**Table S1 B.** Patients data of Ki-67 quantitative StrataQuest analysis in 40 regions of interest (ROIs) collected from 7 patients with paired primary and recurrence tumor samples. The clinical data are listed for ROIs and not for patients. N= 40 (ROIs).

|                           |                               |                   |
|---------------------------|-------------------------------|-------------------|
| <b>Gender</b>             | male                          | 40                |
| <b>Age</b>                | <=50                          | 3                 |
|                           | 51-60                         | 8                 |
|                           | 61-70                         | 15                |
|                           | 71-80                         | 14                |
|                           | >80                           | 0                 |
| <b>Tumor type</b>         | Primary                       | 16                |
|                           | Recurrence                    | 24                |
| <b>Site</b>               | Oral                          | 3                 |
|                           | Larynx                        | 11                |
|                           | Oropharynx                    | 23                |
|                           | Other                         | 3                 |
| <b>histology</b>          | squamous cell carcinoma       | 40                |
| <b>HPV status</b>         | P16-positive ( $\geq 70\%$ )* | 0                 |
|                           | P16-negative ( $< 70\%$ )     | 40                |
| <b>Survival</b>           | alive                         | 28                |
|                           | deceased                      | 12                |
| <b>Treatment modality</b> | <b>Primary tumor</b>          | <b>Recurrence</b> |
| Surgical/ Surgical PORT   | 9                             | 6                 |
| Best supportive care      |                               | 9                 |
| R(C)T                     | 7                             | 9                 |

\*HPV-positivity was also confirmed by HPV-specific PCR.

**Table S2.** Overview of utilized Antibodies for IHC.

| Antibody                     | Isotype               | catalogue number | manufacturer                     | dilution   |
|------------------------------|-----------------------|------------------|----------------------------------|------------|
| anti-KLF4                    | rabbit IgG            | ab215036         | Abcam, Cambridge, UK             | 1:2000     |
| anti-Slug                    | mouse IgG1            | 564614           | BD/Pharmingen, Vienna Austria    | 1:250      |
| anti-Ki67                    | mouse IgG1            | E059             | Linaris, Dossenheim, Germany     | prediluted |
| Universal secondary antibody | mouse/rabbit reactive | 760-4205         | Roche Ventana, Mannheim, Germany | prediluted |

**Table S3.** Overview of utilized primary and secondary antibodies used for western blot analysis.

| Antibody                        | Isotyp      | catalogue number | kDa | manufacturer                                        | dilution |
|---------------------------------|-------------|------------------|-----|-----------------------------------------------------|----------|
| anti-KLF4                       | Rabbit IgG  | ab215036         | 54  | Abcam, Cambridge, UK                                | 1:1000   |
| anti-E-cadherin                 | Mouse IgG2a | 610181           | 120 | BD/Biosciences, Vienna Austria                      | 1:2 500  |
| anti-Slug                       | Rabbit IgG  | 9585             | 30  | Cell Signaling, Danvers, MA, USA                    | 1:1000   |
| anti-phospho-p38 MAPK           | Rabbit IgG  | 4511S            | 43  | Cell Signaling, Danvers, MA, USA                    | 1:1000   |
| anti-Vimentin (SP-20)           | Rabbit IgG  | M3202            | 53  | Spring/Linaris, Dossenheim, Germany                 | 1:100    |
| anti-GAPDH                      | Mouse IgG1  | ab8245           | 36  | Abcam, Cambridge, UK                                | 1:5000   |
| Fluorochrome secondary antibody |             |                  |     |                                                     |          |
| $\alpha$ mouse IgG2a 800 CW     | IgG2a       | 926-32351        |     | LiCor Bioscience, Bad Homburg vor der Höhe, Germany | 1:5000   |
| $\alpha$ mouse IgG1 680LT       | IgG1        | 926-68050        |     | LiCor Bioscience, Bad                               | 1:10000  |

|                               |     |           |  |                                                                 |         |
|-------------------------------|-----|-----------|--|-----------------------------------------------------------------|---------|
|                               |     |           |  | Homburg vor<br>der Höhe,<br>Germany                             |         |
| $\alpha$ rabbit IgG<br>800CW  | IgG | 926-32213 |  | LiCor<br>Bioscience, Bad<br>Homburg vor<br>der Höhe,<br>Germany | 1:5000  |
| $\alpha$ mouse IgG<br>IR800   | IgG | AC2135    |  | Azure Biotech,<br>Houston, TX,<br>USA                           | 1:2500  |
| Peroxidase secondary antibody |     |           |  |                                                                 |         |
| $\alpha$ mouse IgG<br>HRP     | IgG | 31430     |  | Pierce,<br>ThermoFisher<br>Scientific,<br>Darmstadt,<br>Germany | 1:10000 |
| $\alpha$ rabbit IgG HRP       | IgG | 31460     |  | Pierce,<br>ThermoFisher<br>Scientific,<br>Darmstadt,<br>Germany | 1:10000 |

**Figure S1.** StrataQuest Application to determine tumor cells and disseminating tumor cells in Ki-67 immunohistochemical staining.

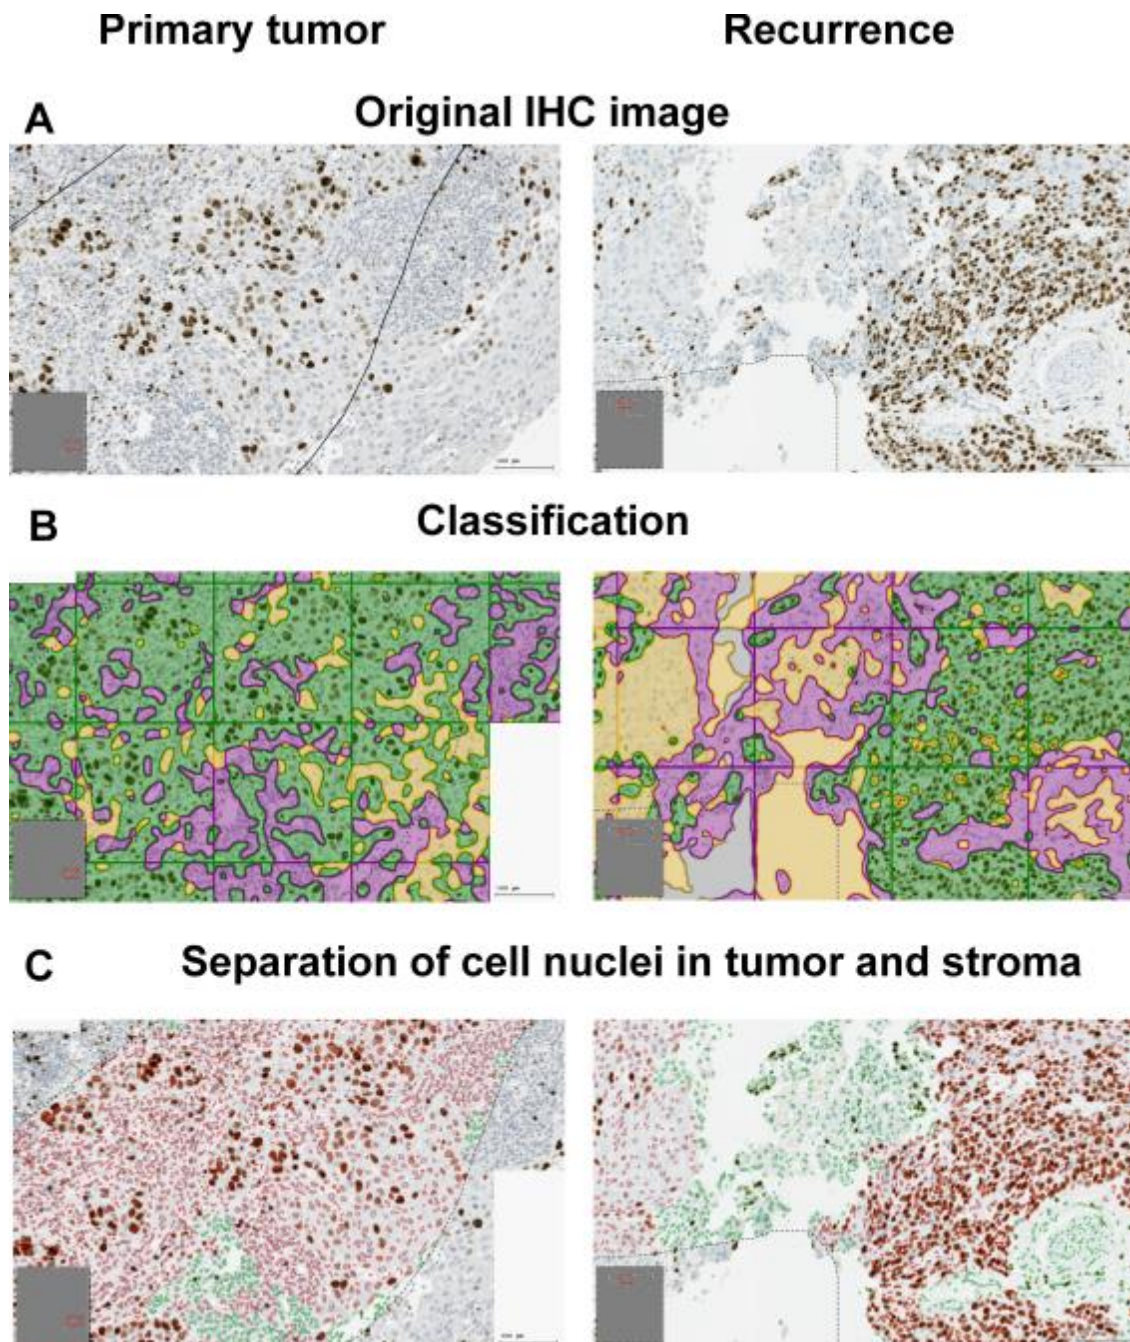



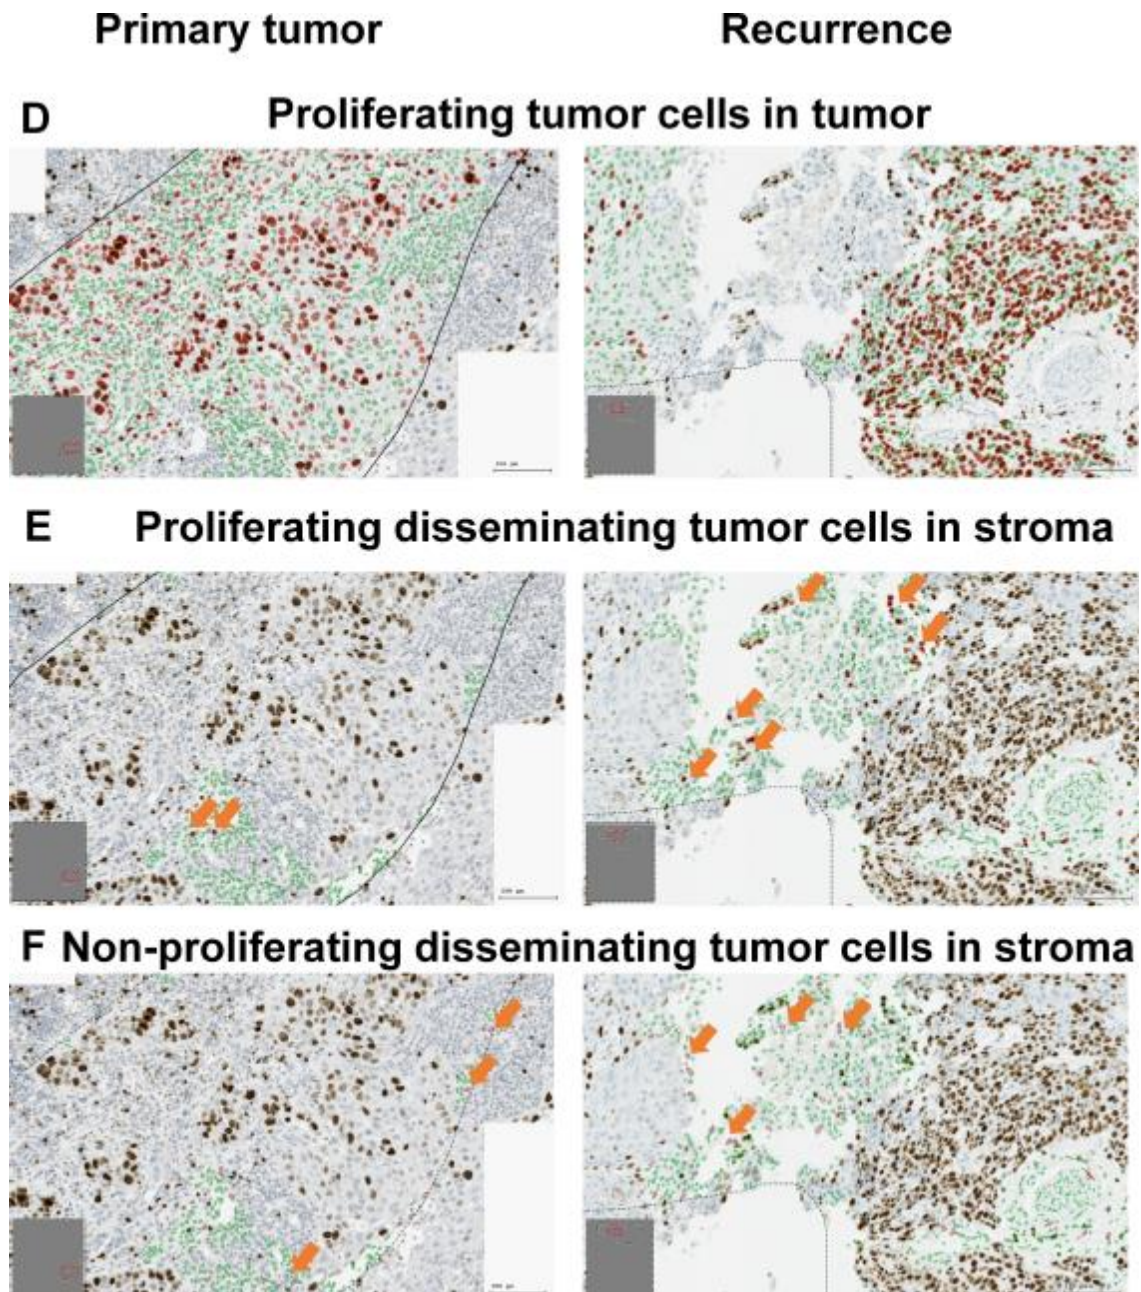

**Figure S1.** Primary tumor (left panel) and recurrence (right panel) from an oropharynx squamous cell carcinoma. **A:** Original immunohistochemical image **B:** A special developed application of TissueGnostics was purchased and used to determine background (grey), cancer cell nests (green), epithelial (yellow) and stroma (purple) areas by a “Classifier” algorithm. **C:** After classification, the cell nuclei could be sorted to cancer cell nests (red marked nuclei) and to stroma regions (green marked nuclei). In further steps Ki-67-positive (brown DAB-staining in the nuclei) and negative (blue cell nuclei) tumor cell nuclei were gated in cancer cell nests (**D**) and in the stroma (**E**) based on their size, morphology and localization in the classified area. Red labelled shown the Ki-67<sup>+</sup> tumor cell nuclei in cancer cell nest (**D**) and in stroma (**E**). Other cells (non-proliferating tumor cells and embedded stroma cells in cancer cell nest in **D**, stroma cells and non-proliferating tumor cells in stroma in **E**) are shown in green. The application could distinguish proliferating and non-proliferating tumor cells and stroma cells in both localisations: cancer cell nests and stroma. **F** shows non-proliferating tumor cells disseminated in stroma in red. In figures **E** and **F** examples of red labelled disseminating tumor cells are also shown with orange arrows. Scale bars represent 100 µm on all

images. On Figure E right panel the Ki-67<sup>+</sup> clusters of cells embedded in stroma are well visible, which might derive from collective migration of pEMT cells, a point further elucidated experimentally in this article.

**Figure S2.** Western blot analysis in SCC-25 cells.

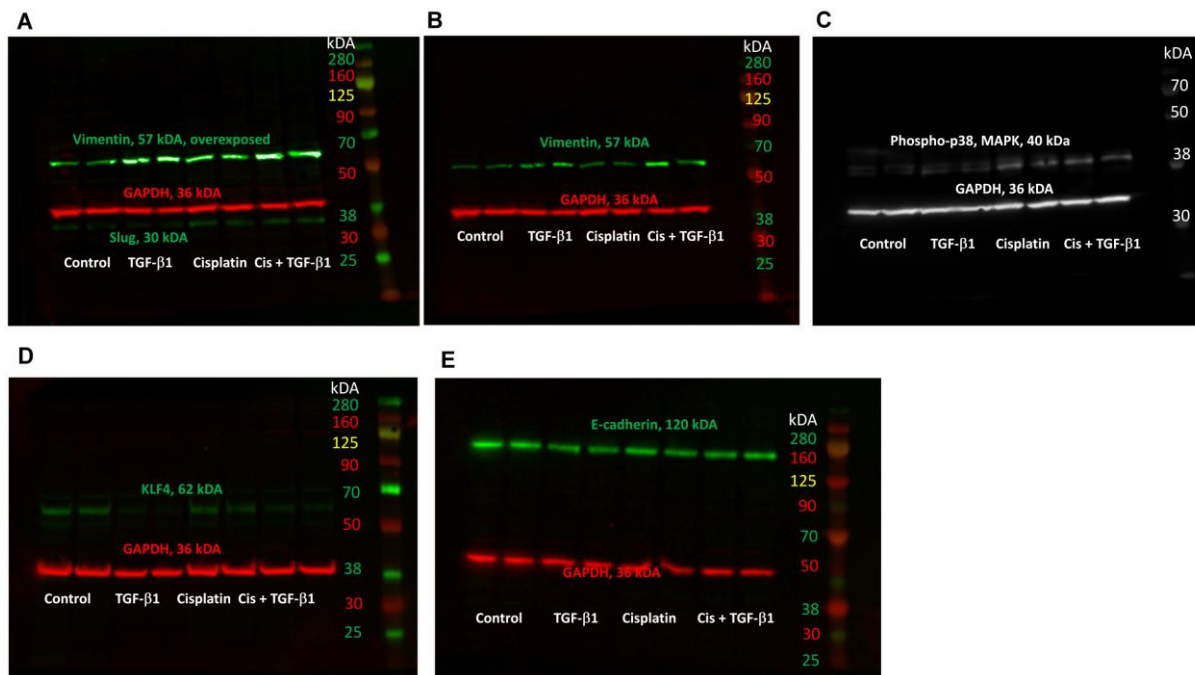

**Figure S2.** Western Blot of Slug/Vimentin (A), Vimentin (B), phospho-p38 (C), KLF4 (D) and E-cadherin (E) after TGF-beta1, and Cisplatin treatments. The proteins of interest are presented in green and were detected at 800 nm, the loading control GAPDH is presented in red and was detected at 700 nm (A, B, D, E). Panel C is a combination of the chemiluminescence detection of p-p38 and the near infrared detection of GAPDH. Thirty thousand SCC-25 cells per ml were plated on six-well-plates. After 24 hours all cells were supplied with serum-free DMEM-F12 medium (serum proteins were replaced with bovine serum albumin). From day 2 until day 5 cells were treated with serum-free medium optionally supplemented with 1 ng/ml TGF-beta1. From day 5 until day 8 cells were treated with serum-free medium optionally supplemented with 1 ng/ml TGF-beta1, or with 10  $\mu$ M Cisplatin or with TGF-beta1 and Cisplatin combined as indicated on the images.

**Figure S3.** Western blot analysis in UPCI-SCC-090 cells.

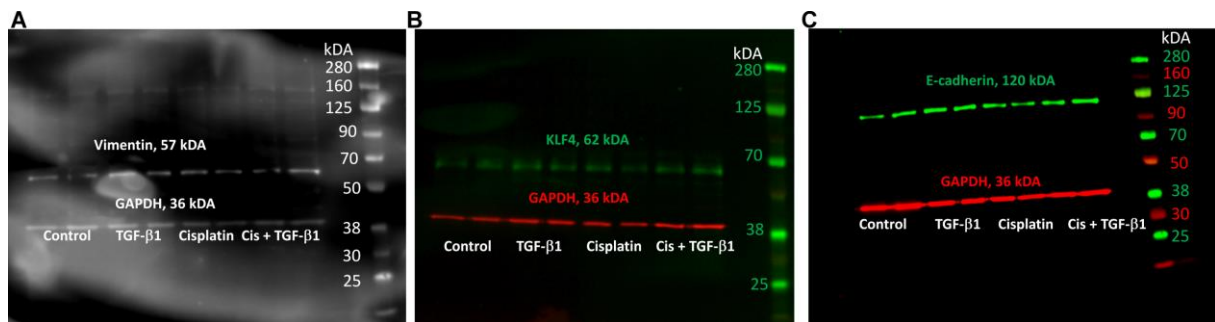

**Figure S3.** Thirty thousand UPCI-SCC090 cells per ml were plated on six-well-plates. After 24 hours all cells were supplied with serum-free EMEM medium (serum proteins were replaced with bovine serum albumin). From day 2 until day 5 cells were treated with serum-free medium supplemented with 1 ng/ml TGF-beta1 in some cases. From day 5 until day 8 cells were treated with serum-free medium in some cases supplemented with 1 ng/ml TGF-beta1, or with 7  $\mu$ M Cisplatin or with TGF-beta1 and Cisplatin combined as indicated on the figures. Protein levels of Vimentin (A) as EMT factor, KLF4 and E-cadherin (B, C) as epithelial markers were analysed by western blotting, GAPDH was used as loading control. All experiments were repeated as complete three biological repeats. Panel A was developed by chemiluminescence. The proteins of interest are presented in green and were detected at 800 nm, the loading control GAPDH is presented in red and was detected at 700 nm (B, C). In UPCI-SCC090 cells no change in epithelial markers were detected by TGF-beta1 or Cisplatin treatments. Vimentin was very low detected using chemiluminescence and did not show any reaction on TGF-beta1 or Cisplatin treatments. Slug or p-MAPK were not detected at all.



**Figure S4.** Western blot analysis in SCC-25 cells in complex experiment of TGF-beta-1-pretreatment, KLF4-overexpression, and 9 days after Cisplatin-treatment.

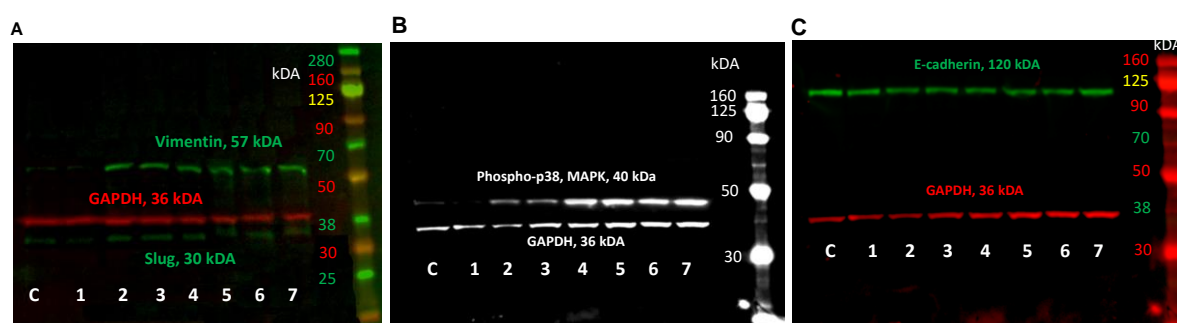

|                                              | C | 1 | 2 | 3 | 4 | 5 | 6 | 7 |
|----------------------------------------------|---|---|---|---|---|---|---|---|
| <b>KLF4 overexpression</b>                   |   | + |   | + |   | + |   | + |
| <b>1 ng/ml TGF-beta-1-pretreatment</b>       |   |   | + | + |   |   | + | + |
| <b>Cisplatin 10 <math>\mu</math>M 9 days</b> |   |   |   |   | + | + | + | + |

**Figure S4.** Seven thousand SCC-25 cells per ml were plated on six-well-plates. After 24 hours all cells were supplied with serum-free DMEM-F12 medium (serum proteins were replaced with bovine serum albumin). From day 2 until day 6 and from day 6 until day 8 cells were treated with serum-free medium or with 1 ng/ml TGF-beta1 (**lower panel; treatments table**). On days 8 and 9 cells were transfected with expression vectors (empty vector and KLF4-overexpressing vector) and further cultured from day 10 until 13 with 10% serum-containing DMEM-F12 medium. On day 13 cells were 24 hours treated with 10  $\mu$ M Cisplatin, passaged and replated at  $3 \times 10^4$  cells/ml (**lower panel; treatments table**). Cells were cultured for 9 days, and used for protein analysis. Typical western blots of Slug/Vimentin (**A**), phospho-p38 (MAPK) (**B**) and E-cadherin (**C**) three days after transfection in control (serum-free-pretreated), empty vector transfected cells ("C" in images **A-C**) in serum-free-pretreated KLF4-transfected cells (1), in TGF-beta1-pretreated empty vector transfected cells (2), in TGF-beta1-pretreated KLF4 vector transfected cells (3); and 9 days after Cisplatin treatment in control (serum-free-pretreated), empty vector transfected cells (4) in serum-free-pretreated KLF4-transfected cells (5), in TGF-beta1-pretreated empty vector transfected cells (6), in TGF-beta1-pretreated KLF4 vector transfected cells (7). The proteins of interest are presented in green and were detected at 800 nm, the loading control GAPDH is presented in red and was detected at 700 nm (**A, C**). Panel **B** is a combination of the chemiluminescence detection of p-p38 and the near infrared detection of GAPDH.

The treatments and sample schedules are summarized in **lower panel; treatments table**.

**Document S1: On in silico analysis of the SLUG Promoter.**

Our *in silico* analysis using the Ensembl databank (European Molecular Biology Laboratory's European Bioinformatics Institute, on the Wellcome Genome Campus in Hinxton, south of the city of Cambridge, United Kingdom.) revealed a potential of direct regulation of Slug by KLF4.

Slug promoter contains KLF4 responsive elements:

Reference Ensembl site:

[http://www.ensembl.org/Homo\\_sapiens/Transcript/Exons?db=core;g=ENSG00000019549;r=8:48917598-48921740;t=ENST00000020945](http://www.ensembl.org/Homo_sapiens/Transcript/Exons?db=core;g=ENSG00000019549;r=8:48917598-48921740;t=ENST00000020945)

The KLF4 binding core sequence is:

GGGTG in antisense orientation in the Slug UTR region.

ctttcttgcaaaagagaggaaaaaaaacacctcccagccaaaacgggctc  
AGTTCGTAAAGGAGCC**GGGTG**ACTTCAGAGGCGCCGGCCCGTCCGTCTGCCGCACCTGAG  
CACGGCCCTGCCGAGCCTGGCCCGCCGCGATGCTGTAGGGACCGCCGTGTCTCTCCGC  
CGGACCGTTATCCGCGCCGGGCGCCCGCCAGACCCGCTGGCAAG

In addition, KLF4 responsive sequences are also found in sense orientation in the Intron3: TTTTTTCTCCACTC**CACCCC**CAG and also in the 3' untranslated region:

[illegible]

Graphical presentation of KLF4 binding positions around the Slug gene, chromosomal area.

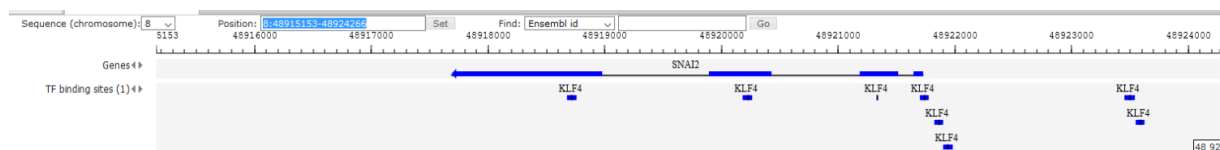

**Reference for the KLF4-binding motif:** Kaczynski J, Cook T, and Urrutia R (2003) Sp1- and Kruppel-like transcription factors. *Genome Biol.* 4, 206.
